# Supplementary material
Source: publisher figshare collection journal article supplement (https://future-science-group.figshare.com/ndownloader/files/30807508)
Supplement: Supplementary file 1 [file 30807508]

**Supplementary Information**


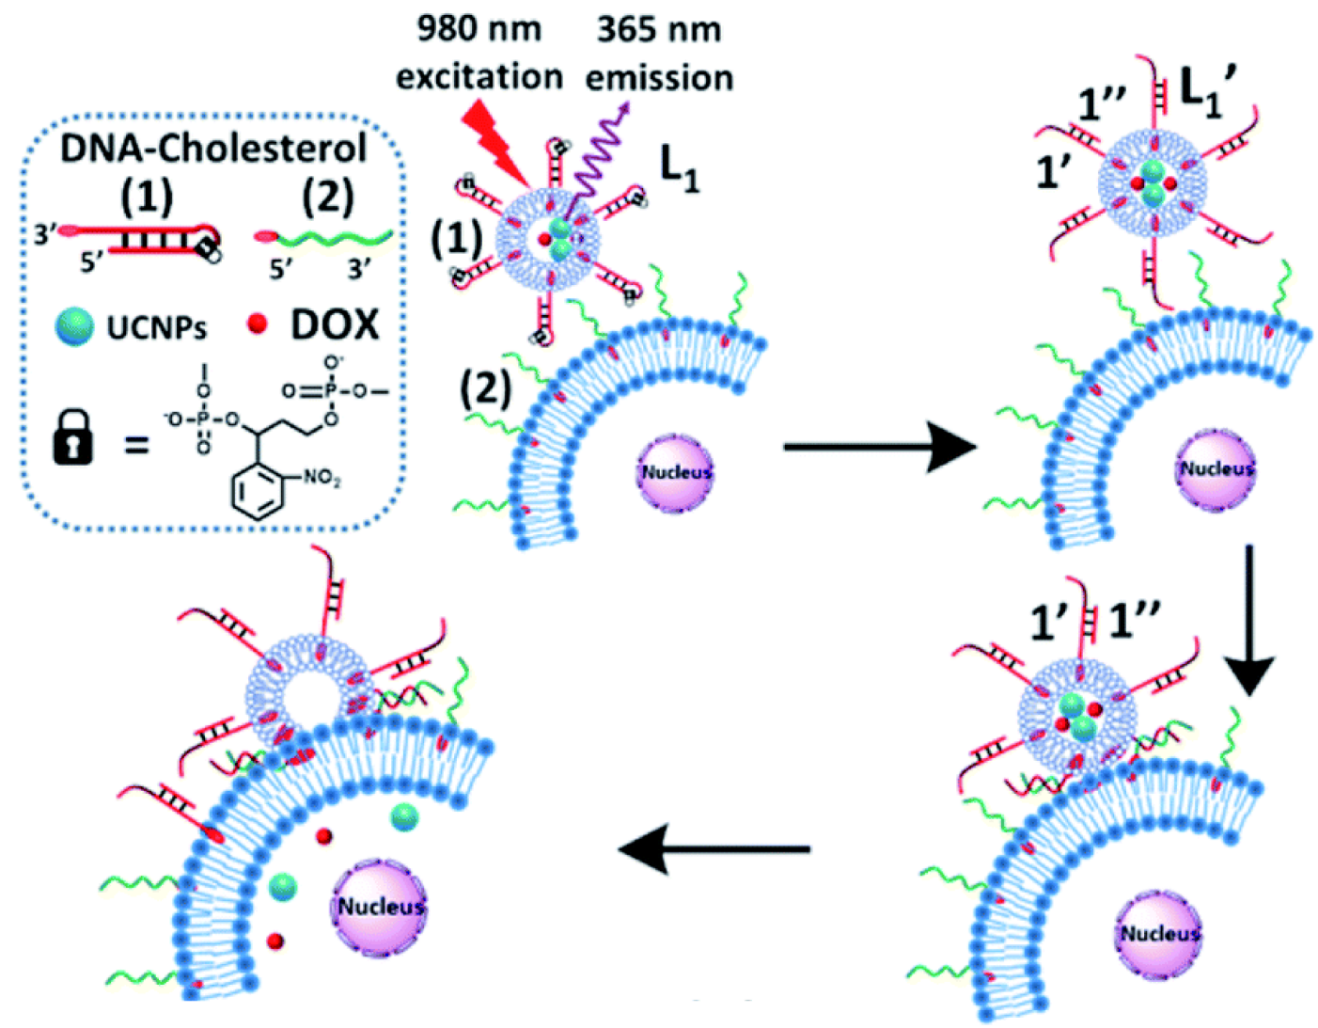


Supplementary Figure 1. Schematic of light-controlled liposome–membrane fusion process. UCNPs: Upconversion nanoparticles; DOX: Doxorubicin. Reproduced with permission from [1], licensed with CC BY 3.0.


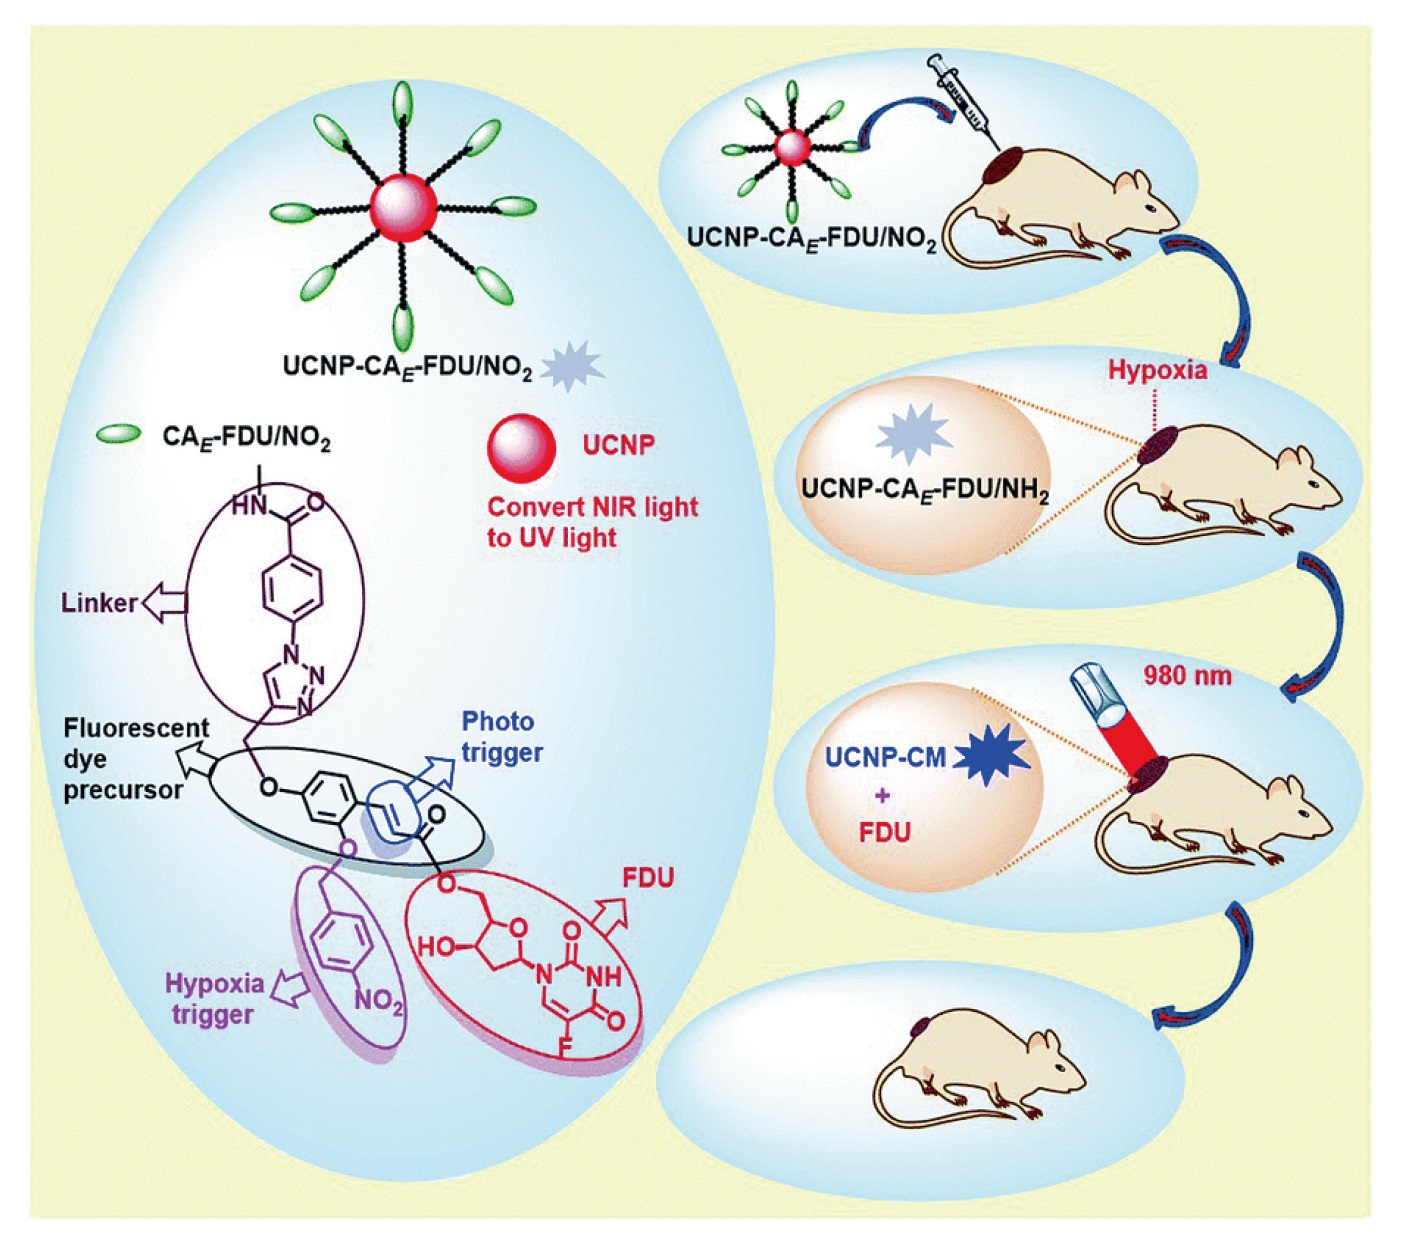


Supplementary Figure 2. Schematic illustration of the UCNP-CA*E*-FDU/NO2-based theranostic nanoplatform under the hypoxia state. UCNPs: Upconversion nanoparticles; NIR: Near infrared; UV: Ultraviolet; CA*E*: (*E*)-*o*-hydroxycinnamic acid; FDU: Floxuridine; CM: 7-propargyloxycoumarin. Reproduced with permission from [2], © 2018 Royal Society of Chemistry.


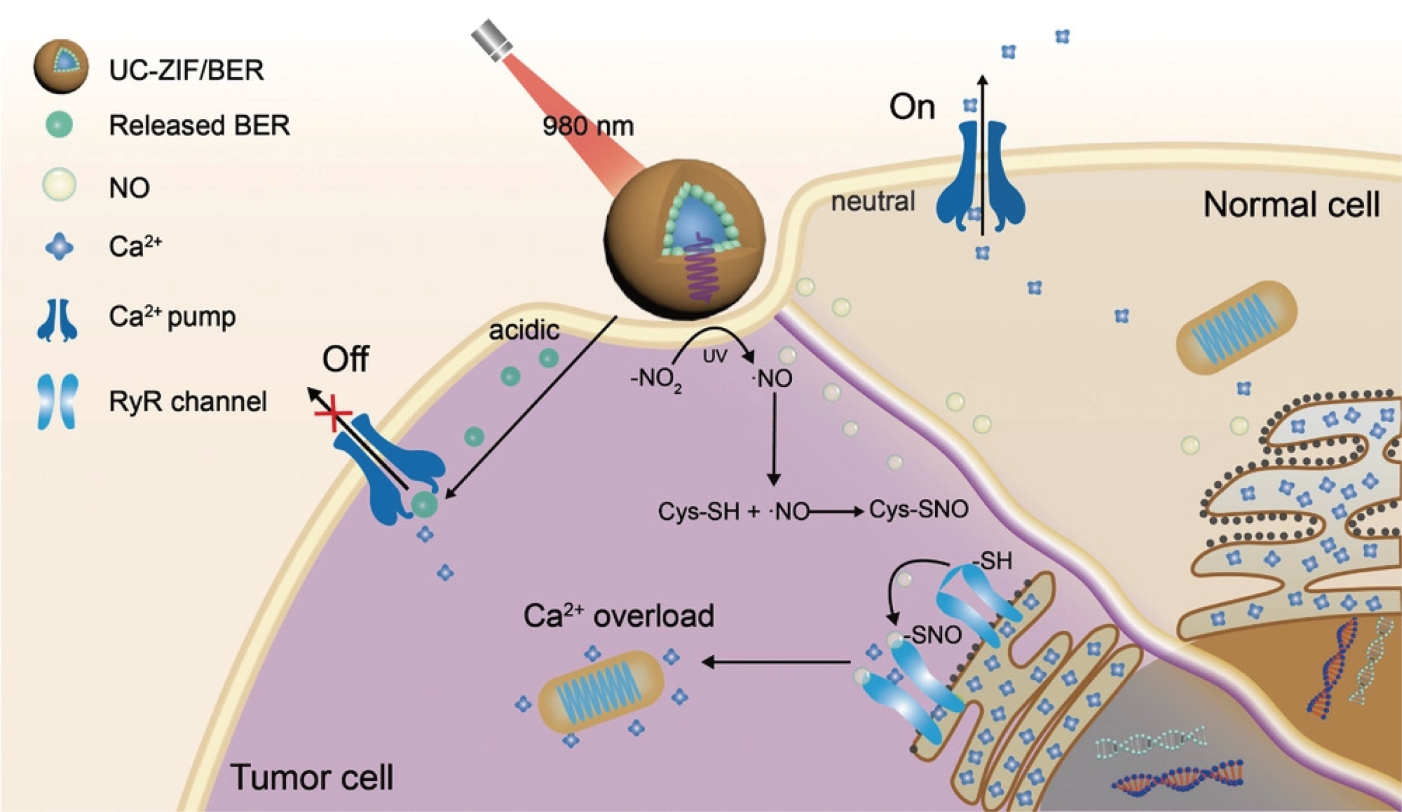


Supplementary Figure 3. Schematic demonstration of NO-modulated and overloaded Ca2+-triggered tumor cell killing effect. UC: Upconversion; ZIF: Zeolitic framework; BER: Berbamine; NO: Nitric oxide; RyR: Ryanodine receptors. Reproduced with permission from [3], © 2021 Wiley-VCH GmbH.


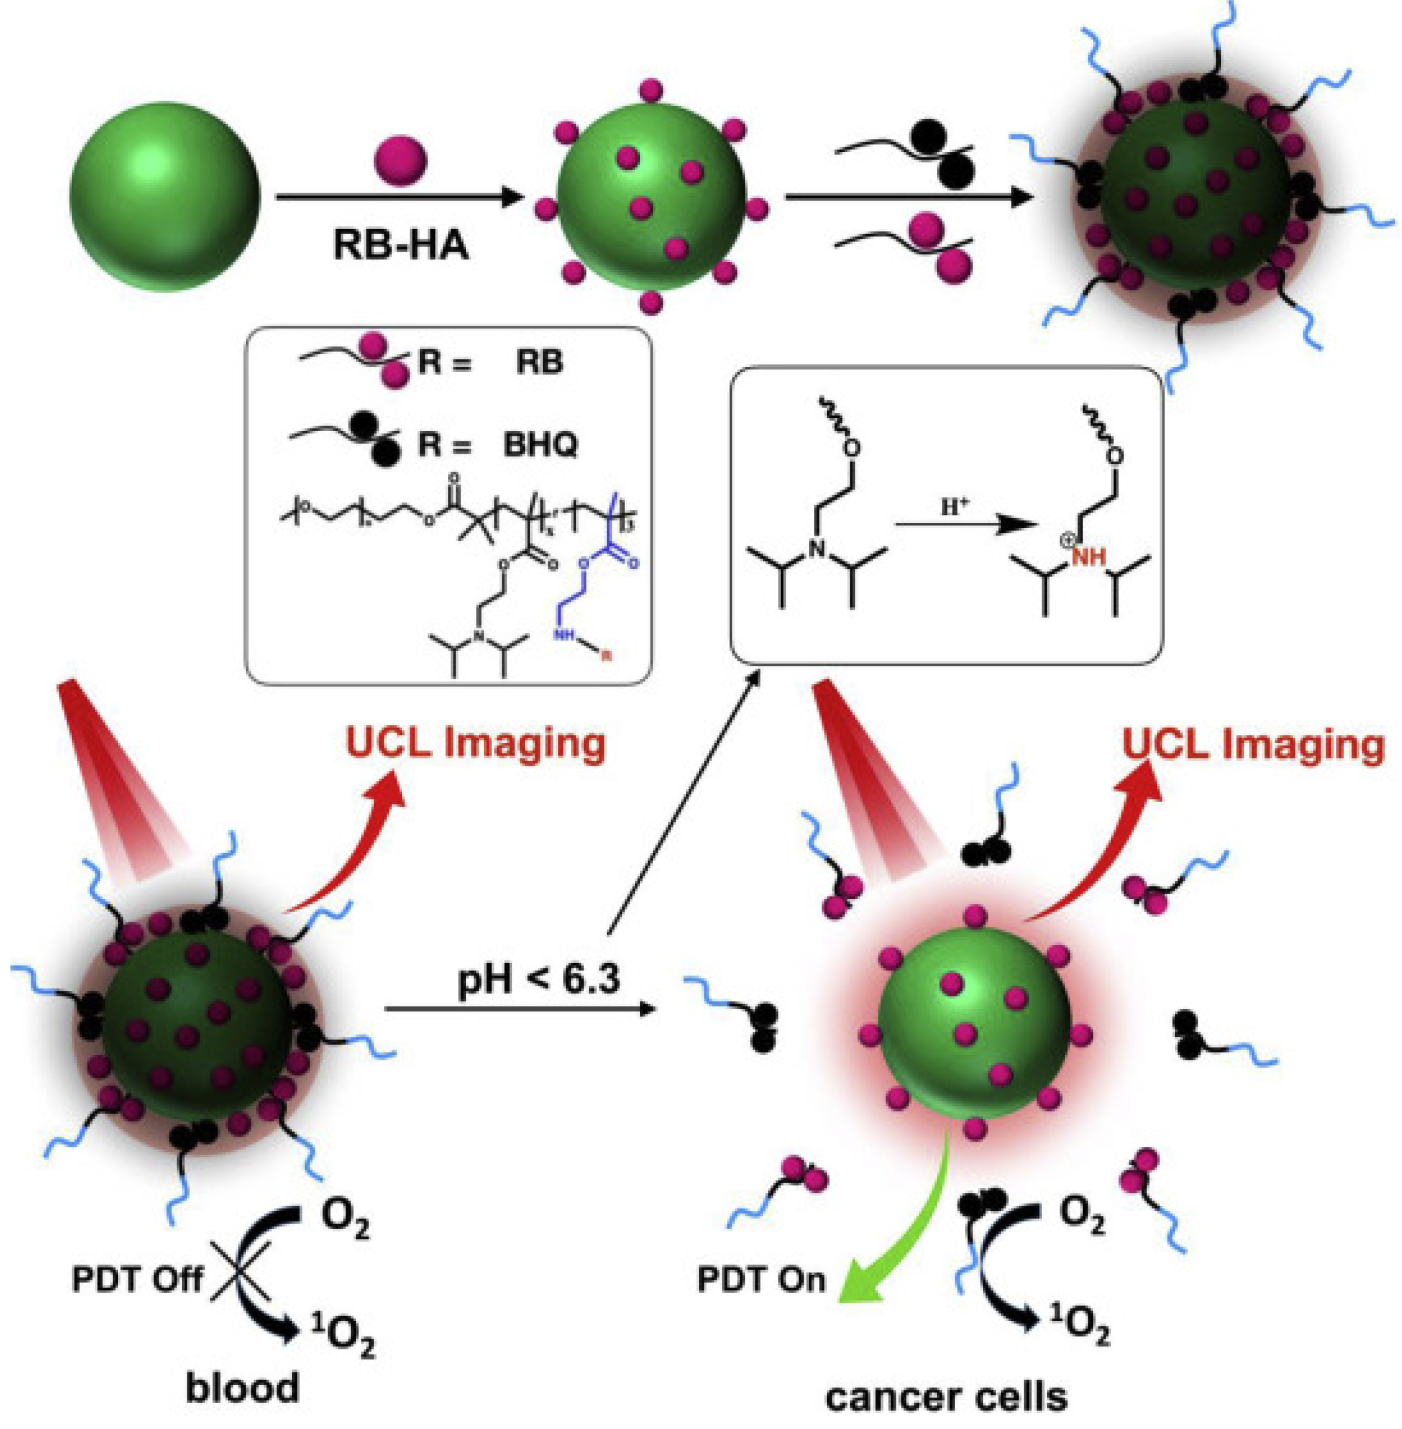


Supplementary Figure 4. Illustration of the design for separating the imaging and PDT. UCL: Upconversion light; PDT: Photodynamic therapy; RB-HA: rose bengal hexanoic acid; BHQ: Black hole quencher. Reproduced with permission from [4], © 2019 Elsevier Ltd.


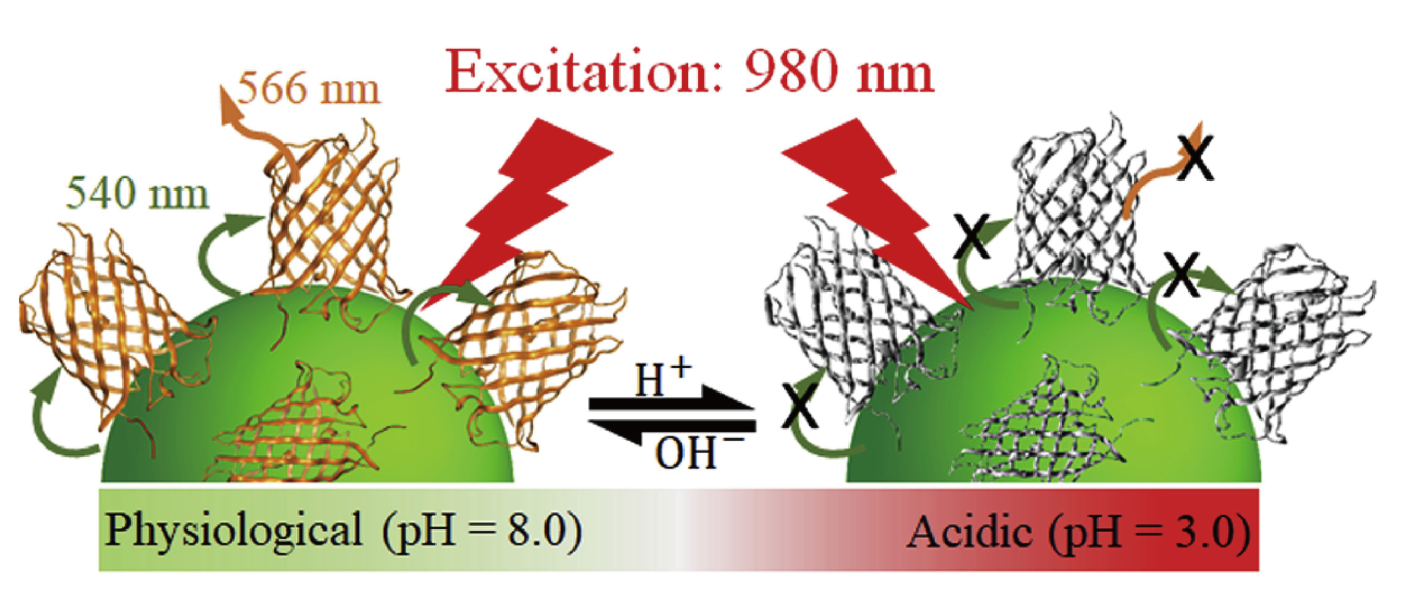


Supplementary Figure 5. Illustration of the pH dependent FRET process. Reproduced with permission from [5], © 2020 Elsevier B.V.


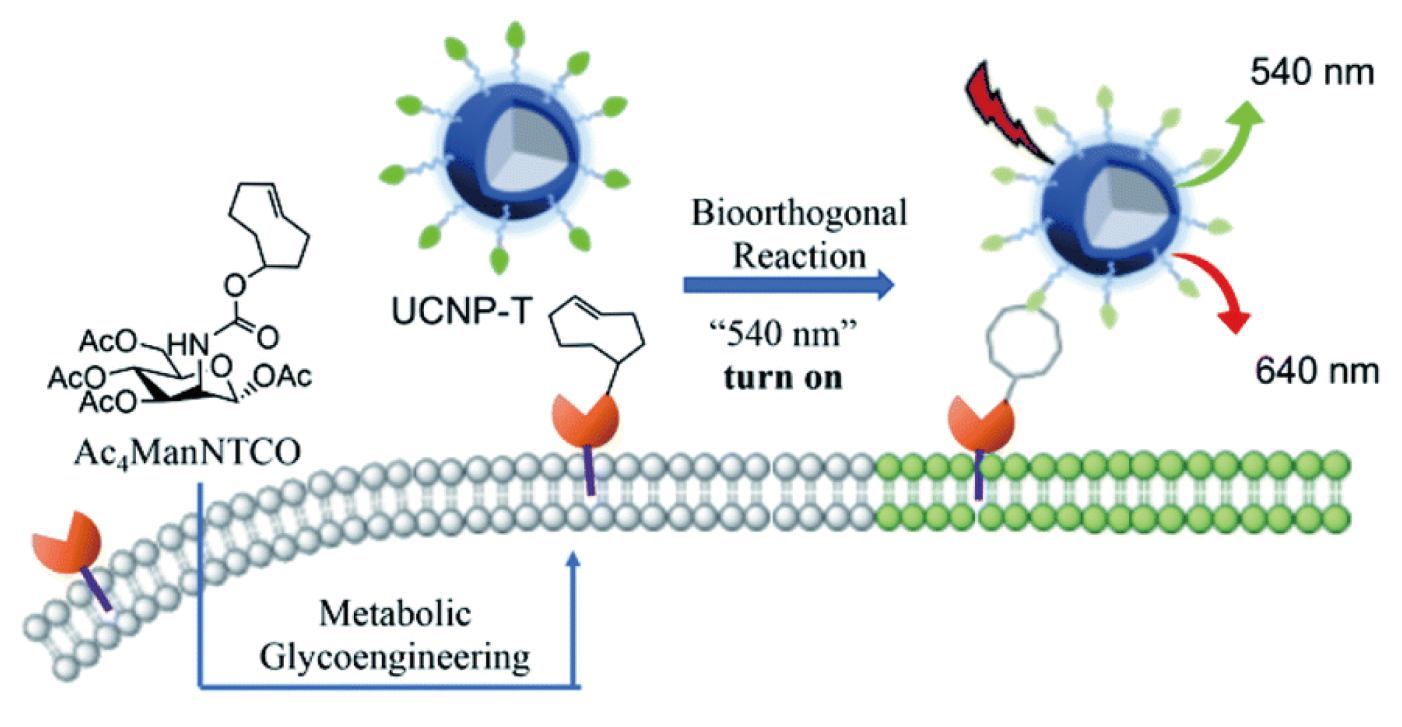


Supplementary Figure 6. Schematic illustration of the glycans detection on the cancer cell membrane. UCNP: Upconversion nanoparticle. Reproduced with permission from [6], licensed with CC BY-NC 3.0.


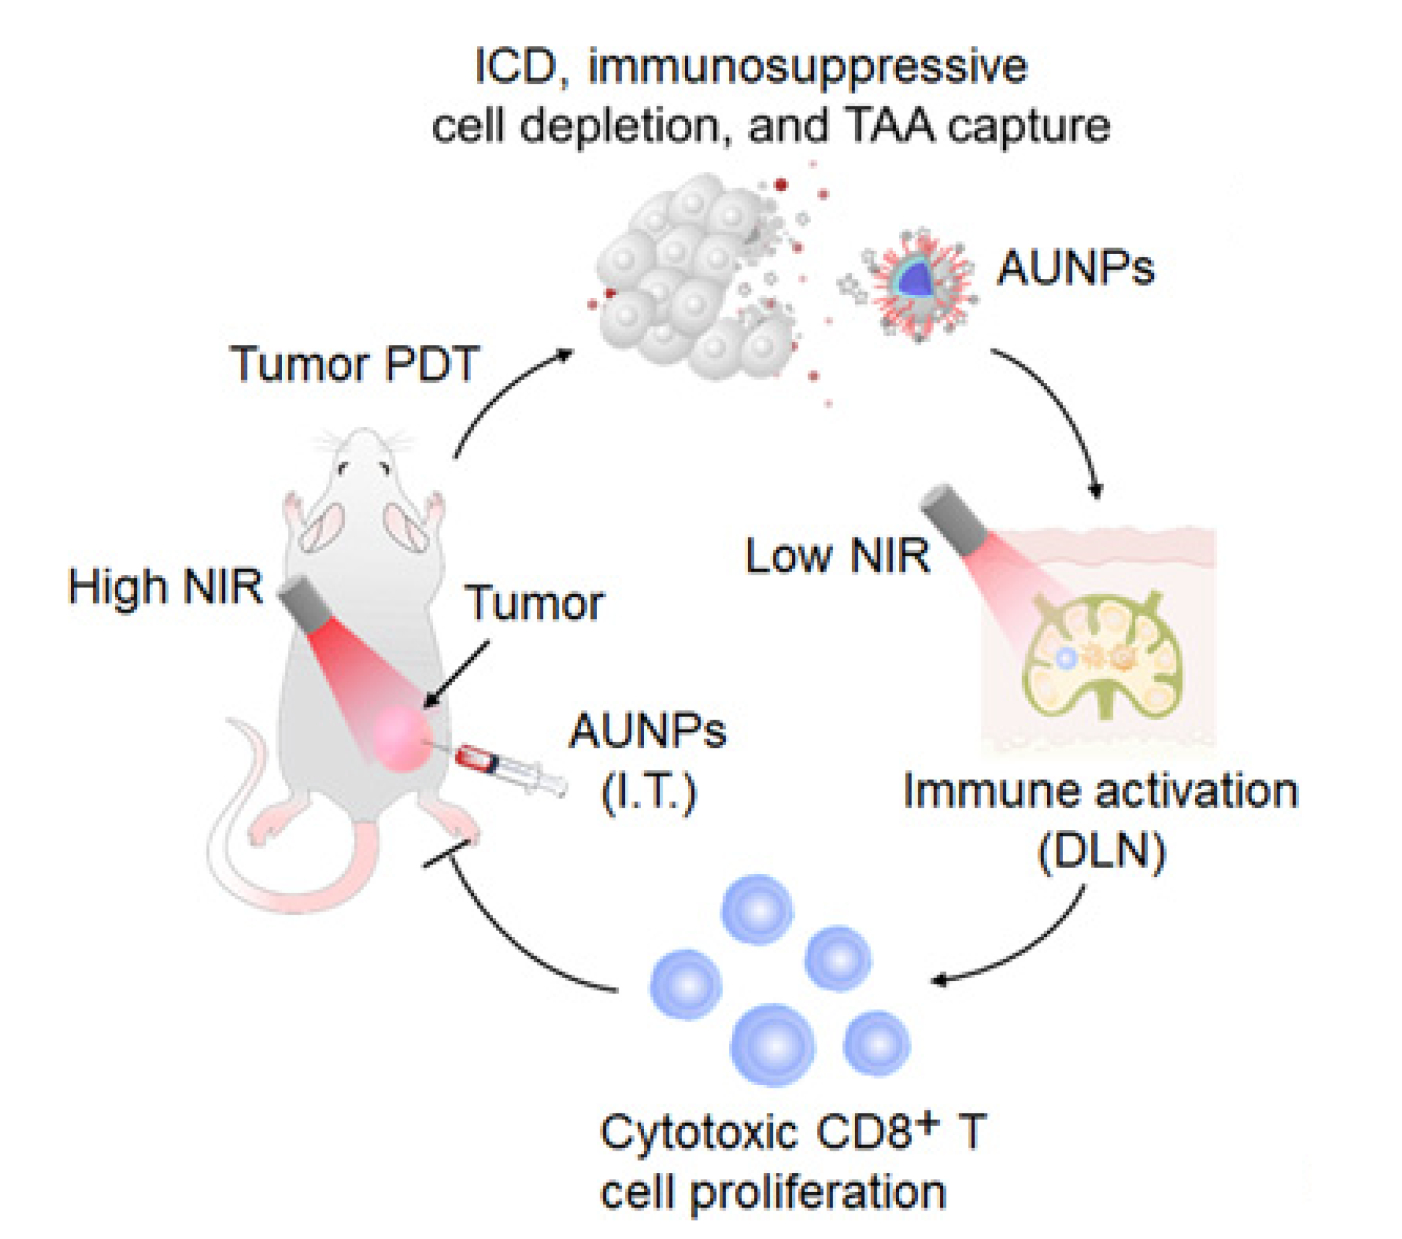


Supplementary Figure 7. Schematic overview of tumor immunotherapy activated by dual-mode ROS. AUNPs: AIEgen-coupled upconversion nanoparticles; NIR: Near infrared; PDT: Photodynamic therapy; ICD: Immunogenic cell death; TAA: Tumor-associated antigen; DLN: Draining lymph node; I.T.: Intratumoral injection. Reproduced with permission from [7], licensed with CC BY-NC 4.0.


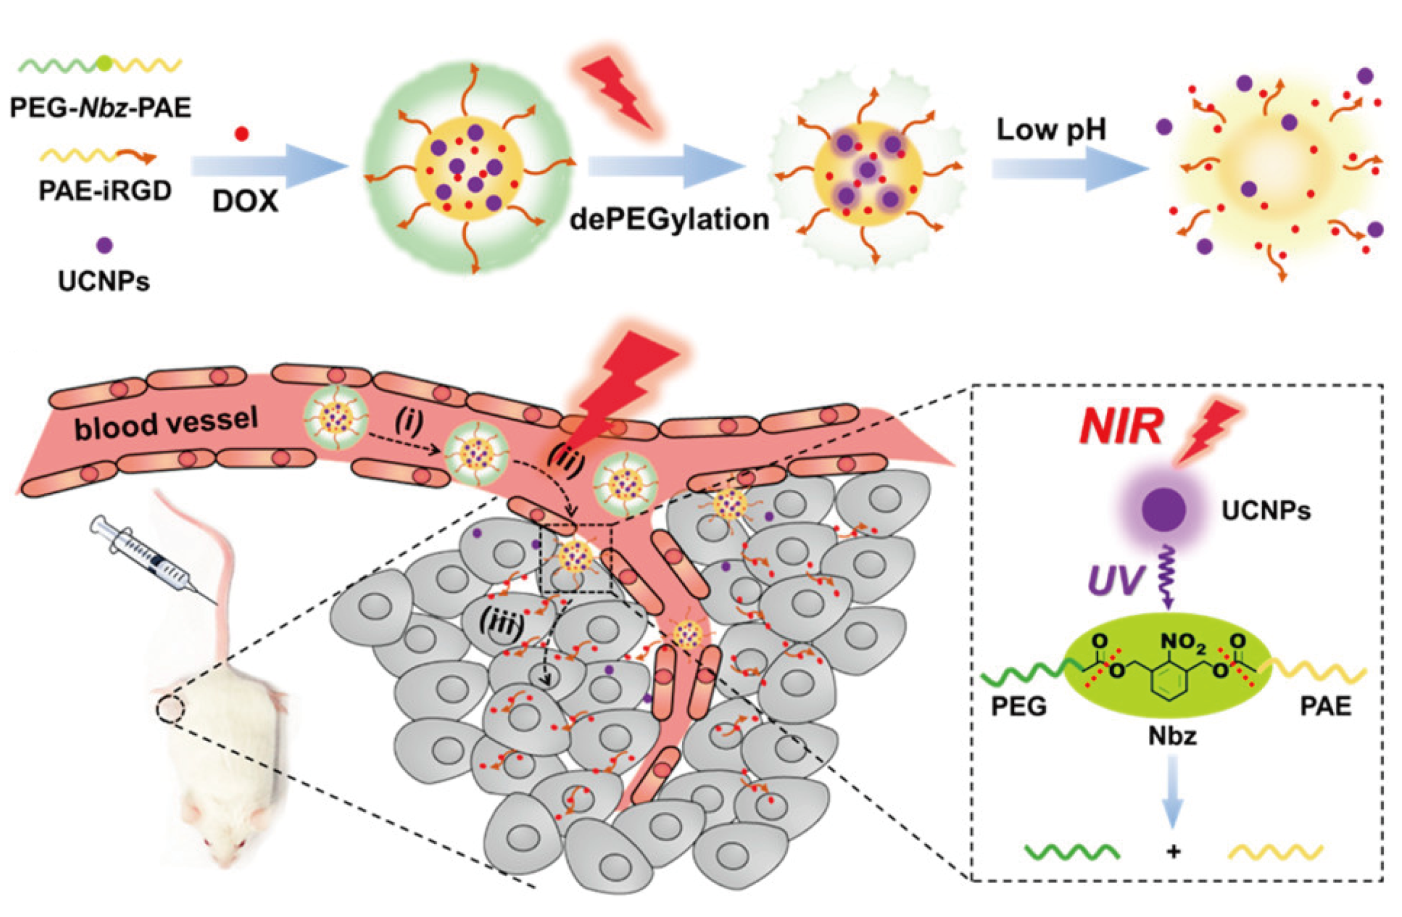


Supplementary Figure 8. Schematic illustration of NIR-controlled dePEGylation for improving the tumor penetration. UCNPs: Upconversion nanoparticles; NIR: Near infrared; UV: Ultraviolet; PEG: Polyethyleneglycol; DOX: doxorubicin; PAE: poly(β-aminoester)s. Reproduced with permission from [8], © 2019 American Chemical Society.

**Supplementary Table 1.** A summary of UCNP-based nanoplatforms for light-controlled drug release.

| **Nanoplatform** | **UCNP** | **Photoresponsive moieties** | **Drug** | **Ref.** |
| --- | --- | --- | --- | --- |
| UCNP–ONB–FU | NaYF4:Yb,Tm@NaYF4 | *o*-nitrobenzyl | 5-FU | [9] |
| DOX-UCNP@PNB-*b*-POEG | NaYF4:Yb,Tm@NaYF4 | *o*-nitrobenzyl | DOX | [10] |
| DOX-UCNP@mPEG-PEI-(NBS,OA) | NaYF4:Yb,Er | *o*-nitrobenzyl | DOX | [11] |
| UCNP@Azo-Lipo/DOX | NaGdF4:Yb,Tm@NaGdF4 | azobenzene | DOX | [12] |
| DOX-UCNPs@PAzo/MAA | NaYF4:Yb,Tm@NaYF4 | azobenzene | DOX | [13] |
| DOX-UCNPs@PMA | NaYF4:Yb,Tm@NaLuF4 | azobenzene | DOX | [14] |
| DOX-UCNP@mSiO2-Azo | NaYF4:Yb,Tm@NaYF4 | azobenzene | DOX | [15] |
| DOX-UCNP@mSiO2-DNQ-CD | NaYF4:Yb,Tm@NaYF4 | DNQ | DOX | [16] |
| UCNP@mSiO2(DOX)-S-BP@β-CD | NaYF4:Yb,Tm@NaYF4 | thioether | DOX | [17] |
| DOX-UCNP-TiO2@mSiO2-Ru2-Au | NaYF4:Yb,Tm,Er,Fe@NaYbF4:Tm | Ru2 | DOX | [18] |
| UCNP@mSiO2/HA-DOX@CNBA | NaYF4:Yb,Tm@NaYF4 | CNBA | DOX | [19] |
| UCNPs@SiO2@mSiO2-SP/Curcumin | NaYF4:Yb,Tm | spiropyran | Curcumin | [20] |
| UCNP: Upconversion nanoparticle; ONB: *o*-nitrobenzyl; 5-FU: 5-fluorouracil; DOX: Doxorubicin; PNB: Poly(4,5-dimethoxy-2-nitrobenzyl methacrylate); POEG: Poly(methoxy polyethylene glycol monomethacrylate); mPEG-PEI: mPEGylated polyethyleneimine; NBS: *o*-nitrobenzyl succinate; OA: Oleic acid; Azo: Azobenzene;PMAA: Poly(methacrylic acid); mSiO2: mesoporous silica; DNQ: 2-diazo-1,2-naphthoquinones; CD: Cyclodextrin; -S-BP: Thioether linkers; HA: Hypocrellin A; CNBA: 4-(2-carboxy-ethylsulfanylmethyl)-3-nitro-benzoic acid linker; SP: Spiropyran. | | | | |

Reference

1. Huang F, Duan R, Zhou Z, Vazquez-Gonzalez M, Xia F, Willner I. Near-infrared light-activated membrane fusion for cancer cell therapeutic applications*.* *Chem. Sci.* 11(21), 5592-5600 (2020).

2. Li H, Lei W, Wu J *et al*. An upconverting nanotheranostic agent activated by hypoxia combined with NIR irradiation for selective hypoxia imaging and tumour therapy*.* *J. Mater. Chem. B* 6(18), 2747-2757 (2018).

3. Chu X, Jiang X, Liu Y *et al*. Nitric oxide modulating calcium store for Ca2+-initiated cancer therapy*.* *Adv. Funct. Mater.* 31(13), 2008507 (2021).

4. Feng Y, Chen H, Wu Y *et al*. Optical imaging and pH-awakening therapy of deep tissue cancer based on specific upconversion nanophotosensitizers*.* *Biomaterials* 230, 119637 (2020).

5. Ghosh S, Chang YF, Yang DM, Chattopadhyay S. Upconversion nanoparticle-mOrange protein FRET nanoprobes for self-ratiometric/ratiometric determination of intracellular pH, and single cell pH imaging*.* *Biosens. Bioelectron.* 155, 112115 (2020).

6. Zhang R, Zheng J, Zhang T. In vivo selective imaging of metabolic glycosylation with a tetrazine-modified upconversion nanoprobe*.* *RSC Adv.* 10(27), 15990-15996 (2020).

7. Mao D, Hu F, Yi Z, Kenry K, Liu B. AIEgen-coupled upconversion nanoparticles eradicate solid tumors through dual-mode ROS activation*.* *Sci. Adv.* 6(26), eabb2712 (2020).

8. Zhou M, Huang H, Wang D *et al*. Light-triggered PEGylation/dePEGylation of the nanocarriers for enhanced tumor penetration*.* *Nano Lett.* 19(6), 3671-3675 (2019).

9. Fedoryshin L, Tavares A, Petryayeva E, Doughan S, Krull U. Near-infrared-triggered anticancer drug release from upconverting nanoparticles*.* *ACS Appl. Mater. Interfaces* 6(16), 13600-13606 (2014).

10. Xiang J, Tong X, Shi F, Yan Q, Yu B, Zhao Y. Near-infrared light-triggered drug release from UV-responsive diblock copolymer-coated upconversion nanoparticles with high monodispersity*.* *J. Mater. Chem. B* 6(21), 3531-3540 (2018).

11. Zhang J, Tang X, Huang C, Liu Z, Ye Y. Oleic acid copolymer as a novel upconversion nanomaterial to make doxorubicin-loaded nanomicelles with dual responsiveness to pH and NIR*.* *Pharmaceutics* 12(7), 680 (2020).

12. Yao C, Wang P, Li X *et al*. Near-infrared-triggered azobenzene-liposome/upconversion nanoparticle hybrid vesicles for remotely controlled drug delivery to overcome cancer multidrug resistance*.* *Adv. Mater.* 28(42), 9341-9348 (2016).

13. Wang X, Liu X, Wang L *et al*. Synthesis of yolk–shell polymeric nanocapsules encapsulated with monodispersed upconversion nanoparticle for dual-responsive controlled drug release*.* *Macromolecules* 51(24), 10074-10082 (2018).

14. Ma K, Wei X, Liu J *et al*. Near-infrared-light-responsive nanocomposites of cell membrane mimetic copolymers and upconverting nanoparticles for on-demand drug release*.* *ACS Appl. Nano. Mater.* 3(8), 8294-8303 (2020).

15. Liu J, Bu W, Pan L, Shi J. NIR-triggered anticancer drug delivery by upconverting nanoparticles with integrated azobenzene-modified mesoporous silica*.* *Angew. Chem. Int. Ed. Engl.* 52(16), 4375-4379 (2013).

16. Han R, Shi J, Liu Z, Hou Y-F, Wang Y. Novel NIR light-triggered hydrophobic-to-hydrophilic switch nanovalve for on-demand cancer therapy*.* *ACS Biomater. Sci. Eng.* 4(10), 3478-3486 (2018).

17. Shi J, Zhao Z, Liu Z, Wu R, Wang Y. Ultralow-intensity NIR light triggered on-demand drug release by employing highly emissive UCNP and photocleavable linker with low bond dissociation energy*.* *Int. J. Nanomedicine* 14, 4017-4028 (2019).

18. Kumar B, Murali A, Mattan I, Giri S. Near-infrared-triggered photodynamic, photothermal, and on demand chemotherapy by multifunctional upconversion nanocomposite*.* *J. Phys. Chem. B* 123(17), 3738-3755 (2019).

19. Zhang T, Lin H, Cui L *et al*. NIR-sensitive UCNP@mSiO2 nanovehicles for on-demand drug release and photodynamic therapy*.* *RSC Adv.* 6, 26479-26489 (2016).

20. Liu C, Zhang Y, Liu M *et al*. A NIR-controlled cage mimicking system for hydrophobic drug mediated cancer therapy*.* *Biomaterials* 139 151-162 (2017).
